# Supplementary material for: Characterization of the Wheat Heat Shock Factor TaHsfA2e-5D Conferring Heat and Drought Tolerance in Arabidopsis
Source: MDPI journal article supplement (doi:10.3390/ijms23052784), 2022-03-03
Supplement: s1 [file s1]

Supplementary Figures and Tables

1 ATGATGAATCCGGTCAAGGTGGAGGGCGCCCCACCCCCACCCCTCCCGCGGGCGCCAGGCGGGCGGCGAGGCGCGATGGACGGGCTGGGCGACGCCGGGCCACGCGGTTTC  
1 M M N P V K V E G R P T P T P S P A A A G G G G A P R P M D G L G D A G P T P F

121 CTCGCCAAGACCTACGACATGGTCGACGACCCCGCCACCGACGCGCTCGTCTCTGGACCGCCACGACAACAGCTTCGTCTGTGGACCCGACCTCTTCGCCACCCCTGCTGCTGCG  
41 L A K T Y D M V D D P A T D A V V S W T A T S N S F V V W D P H L F A T L L L P

241 AGCTACTTCAAGCACAGCAACTTCTCCAGCTTCGTCCGACAGCTCAACACCTATGGCTTCAGAAAAGGTGGATCCTGACAGGTGGGAATTGCAAATGAGGGATTCTTGCGAGGGCAGAGG  
81 S Y F K H S N F S S F V R Q L N T Y G F R K V D P D R W E F A N E G F L R G Q R

361 CACCTTCTCAGAAATATTAAAGCGCCGAAACCTACACACGGGTCTCAGAATCAGCAATCTCTTGCCTCCTACCTTGAGGTGGGAACTTTGGACATGACGTGGAGATAGATCATTGAAA  
121 H L L R N I K R R K P T H G S Q N Q Q S L A S Y L E V G N F G H D V E I D H L K

481 AGGGACAAGCAGCTCTTGATGGCTGAAGTGGTCAAGCTCAGGCAGGAGCAACAGAACACAAGGTCAAGGTCTGCAAGCCATGGAAAAGAGGCTGCAAGGAACCGAGCAGAACAGCAGCAG  
161 R D K Q L L M A E V V K L R Q E Q Q N T R S G L Q A M E K R L Q G T E Q K Q Q Q

601 ATGATGTCGTTCTTGGCGCGAGTCATGCAGAAATCCCGTTTTCATAAGCCAGCTGATCTCCAGAGTGAGATGAGGAAGGAGCTTGAAGATGCCATCTCAAATAAAAGACGCGCGCATC  
201 M M S F L A R V M Q N P V F I R Q L I S Q S E M R K E L E D A I S N K R R R R I

721 GACCAGGGACCTGAAGCCGTCGATAGCATGGGCACTGGCTCTACCCTGGAGCAAGGGTCACATGTAATGTTTGAGCAGCAGGAGCCAGTGATTATTGCTGAACGGTGTATATCCGAT  
241 D Q G P E A V D S M G T G S T L E Q G S H V M F E Q Q E P V D S F V N G V I S D

841 CTTGAAAGCTCGTCCGTCGATACAAAGGGAGCTGAGGTGCAGCAGAGTGTGCTTCCAGCCCTTCGGAGCAACTGAGAGCAGGCCAGTGGAGAGCTAAATGATGATTCTGGGAGGAGC  
281 L E S S S V D T K G A E V Q Q S V A S S R S E Q L R G R P S G E L N D D F W E D

961 CTGCTGCATGAAGGGGGGCTCGGCGAGGAGGCCAGCAACCTTGTGGTTCCAGATGACATGAACCTTGTGGCTGAGAAGCTGGACTAG  
321 L L H E G G L G E E A S N L V V P D D M N L L A E K L D \*

Figure S1. Nucleotide and corresponding amino acid sequences of *TaHsfA2e-5D*. The important domains of TaHsfA2e-5D are indicated as follows: DBD (red), OD (blue), NLS (orange), NES (black underline) and AHA (green).

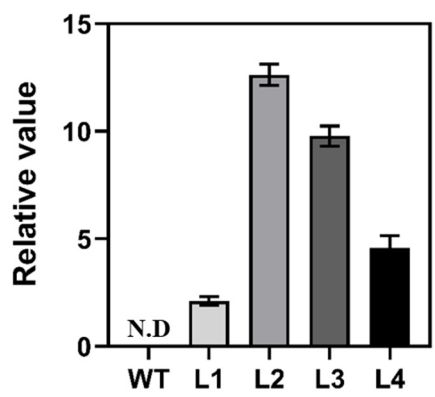

Figure S2. Transcript levels of *TaHsfA2e-5D* in 7-day-old WT and transgenic lines. N.D., Not Detected. *Arabidopsis Actin2* gene was used as the internal standard. Error bars represent means  $\pm$  SD.

Table S1. Primer sequences used in this study.

| Name            | Sequence (5'-3')                           | Application                   |
|-----------------|--------------------------------------------|-------------------------------|
| TaHsfA2e-5D-GF  | TATCTCTCGTGCCTCCCTG                        | Genomic amplification         |
| TaHsfA2e-5D-GR  | TGCGATGGATTATTGTCTGG                       |                               |
| TaHsfA2e-5D-CF  | TATCTCTCGTGCCTCCCTG                        | Chromosomal location          |
| TaHsfA2e-5D-CR  | TGCGATGGATTATTGTCTGG                       |                               |
| TaHsfA2e-5D-PF  | TGGACCAACGAATCACTG                         | cDNA amplification            |
| TaHsfA2e-5D-PR  | CAGGGAGGCACGAGAGATA                        |                               |
| TaHsfA2e-5D-F   | CAGGAGCCAGTGGATTCA                         | Promoter amplification        |
| TaHsfA2e-5D-R   | GGAATTCCTGTTCTTCGAGTAG                     |                               |
| β-Actin-F       | GACCGTATGAGCAAGGAGAT                       | RT-qPCR analysis              |
| β-Actin-R       | CAATCGCTGGACCTGACTC                        |                               |
| Hsp17.7-CII-F   | TCAGGTCCAGATAGAGAACGAGAAC                  |                               |
| Hsp17.7-CII-R   | CCTCTCCATCCTCACAACTTCAC                    |                               |
| Hsp18.1-CI-F    | GGTTACCGGAGAATGCAAAGATG                    |                               |
| Hsp18.1-CI-R    | CGATGGACTTGACTTGAGGCTTC                    |                               |
| Hsp22-ER-F      | GCTTGAGAATGGTGTGCTCAC                      |                               |
| Hsp22-ER-R      | CATGACACTCCATTAGCTTACAC                    |                               |
| Hsp25.3-P-F     | ACGGAGTCCTCTTTATCACTATCCC                  |                               |
| Hsp25.3-P-R     | GATCGAGTCCTACTGAATCTGG                     |                               |
| Hsp26.5-P-F     | ACCTGAGGAAGACGAGTACTGGTC                   |                               |
| Hsp26.5-P-R     | GCCTTAATGTCCTCAACCTTAGC                    |                               |
| Hsp70t-2-F      | CTGTTAACCATAACAAGCCACACCTC                 |                               |
| Hsp70t-2-R      | TGTGTTACGCGGAATCACG                        |                               |
| Hsp90.1-F       | AGATGGCGGTGTCTTGTCACAG                     |                               |
| Hsp90.1-R       | CCATCGCAACGAACCTTTG                        |                               |
| Hsp101-F        | GCCTTACTTCTGCCAAATGCG                      |                               |
| Hsp101-R        | AGATGGCGGTGTCTTGTCACAG                     |                               |
| GolS1-F         | AAACCGCTGATGCTATGTCC                       |                               |
| GolS1-R         | TCACGTAATCACCGTTTCCA                       |                               |
| APX2-F          | AAGTTGAGCCACCTCCTGAA                       |                               |
| APX2-R          | GTGTGTCCACCAGACAATGC                       |                               |
| Actin2-F        | GCTCCTCTTAACCCAAAGGC                       |                               |
| Actin2-R        | CACACCATCACCAGAATCCAGC                     |                               |
| TaHsfA2e-5D-SF  | <u>GGGGACGAGCTCGGTACCATGATGAATCCGGTC</u>   | Subcellular localization      |
| TaHsfA2e-5D-SR  | <u>CATGGTGTGCGACTCTAGAGTCCAGCTTCTCAGC</u>  |                               |
| TaHsfA2e-5D-AF  | <u>TGGCCATGGAGGCCGAATTCATGATGAATCCGGTC</u> | Transactivation analysis      |
| TaHsfA2e-5D-AR  | <u>CGACGGATCCCCGGGAATTCGTCCAGCTTCTCAGC</u> |                               |
| TaHsfA2e-5D-TYF | <u>CCGCCAGTGTGCTGGAATTCATGATGAATCCGGTC</u> | Transgenic yeast              |
| TaHsfA2e-5D-TYR | <u>GATGGATATCTGCAGAATTCGTCCAGCTTCTCAGC</u> |                               |
| TaHsfA2e-5D-TAF | <u>TACACCAAATCGACTCTAGAATGATGAATCCGGTC</u> | Transgenic <i>Arabidopsis</i> |
| TaHsfA2e-5D-TAR | <u>ATAGGTACCCGGGCTCTAGAGTCCAGCTTCTCAGC</u> |                               |
